# Supplementary material for: Comparison of size distribution and electrical particle sensor measurement methods for particle lung deposited surface area (LDSA al ) in ambient measurements with varying conditions
Source: Copernicus journal article supplement (doi:10.5194/ar-2024-13), 2024-05-17
Supplement: Supplementary file 1 [file ar-2024-13-supplement.pdf]

# Supplementary information: Comparison of size distribution and electrical particle sensor measurement methods for lung deposited surface area (LDSA<sup>al</sup>) in road traffic sites with varying conditions

Teemu Lepistö<sup>1</sup>, Henna Lintusaari<sup>1</sup>, Laura Salo<sup>1</sup>, Ville Silvonen<sup>1</sup>, Luis M.F. Barreira<sup>2</sup>, Jussi Hoivala<sup>1</sup>, Lassi Markkula<sup>1</sup>, Jarkko V. Niemi<sup>3</sup>, Jakub Ondracek<sup>4</sup>, Kimmo Teinilä<sup>2</sup>, Hanna E. Manninen<sup>3</sup>, Sanna Saarikoski<sup>2</sup>, Hilikka Timonen<sup>2</sup>, Miikka Dal Maso<sup>1</sup>, Topi Rönkkö<sup>1</sup>

<sup>1</sup>Aerosol Physics Laboratory, Physics Unit, Faculty of Engineering and Natural Sciences, Tampere University, Tampere, 33014, Finland

<sup>2</sup>Atmospheric Composition Research, Finnish Meteorological Institute, Helsinki, 00101, Finland

<sup>3</sup>Helsinki Region Environmental Services Authority HSY, Helsinki, 00066, Finland

<sup>4</sup>Research Group of Aerosol Chemistry and Physics, ICPF CAS, Prague, 165 00, Czechia

## Measurement locations

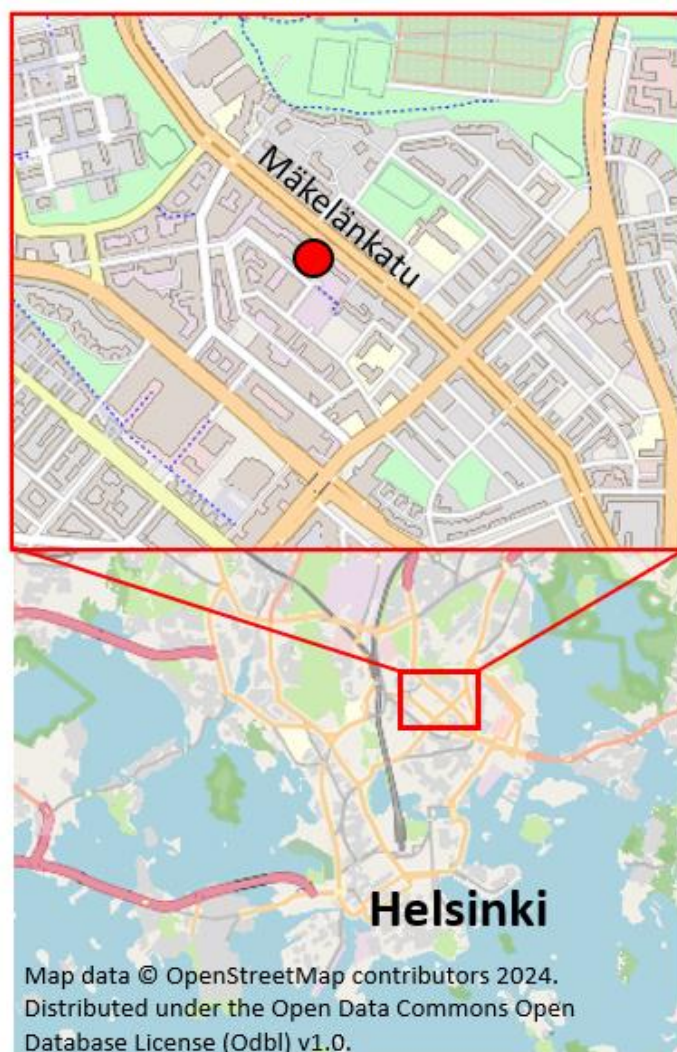

Figure S1: Measurement location in Helsinki (see also Teinilä et al. 2024)

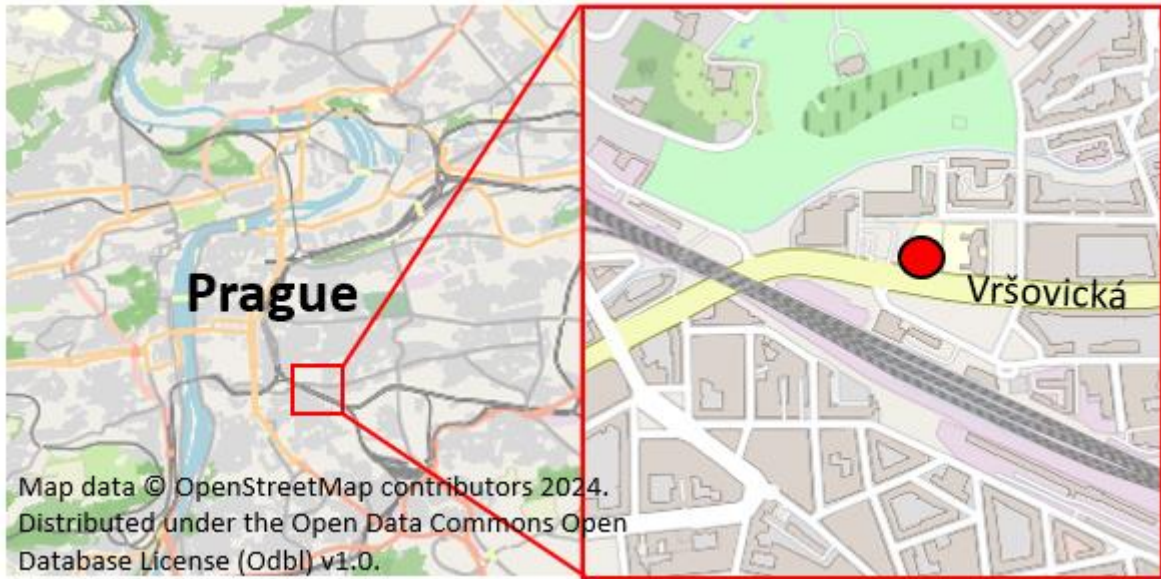

Figure S2: Measurement location in Prague (see also Lepistö et al. 2023)

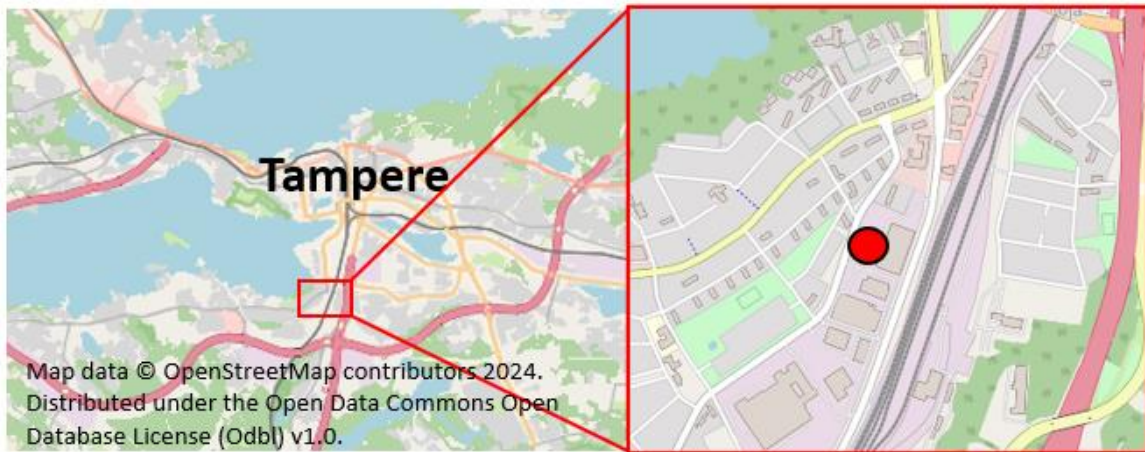

Figure S3: Measurement location in Tampere (see also Silvonen et al. 2023)

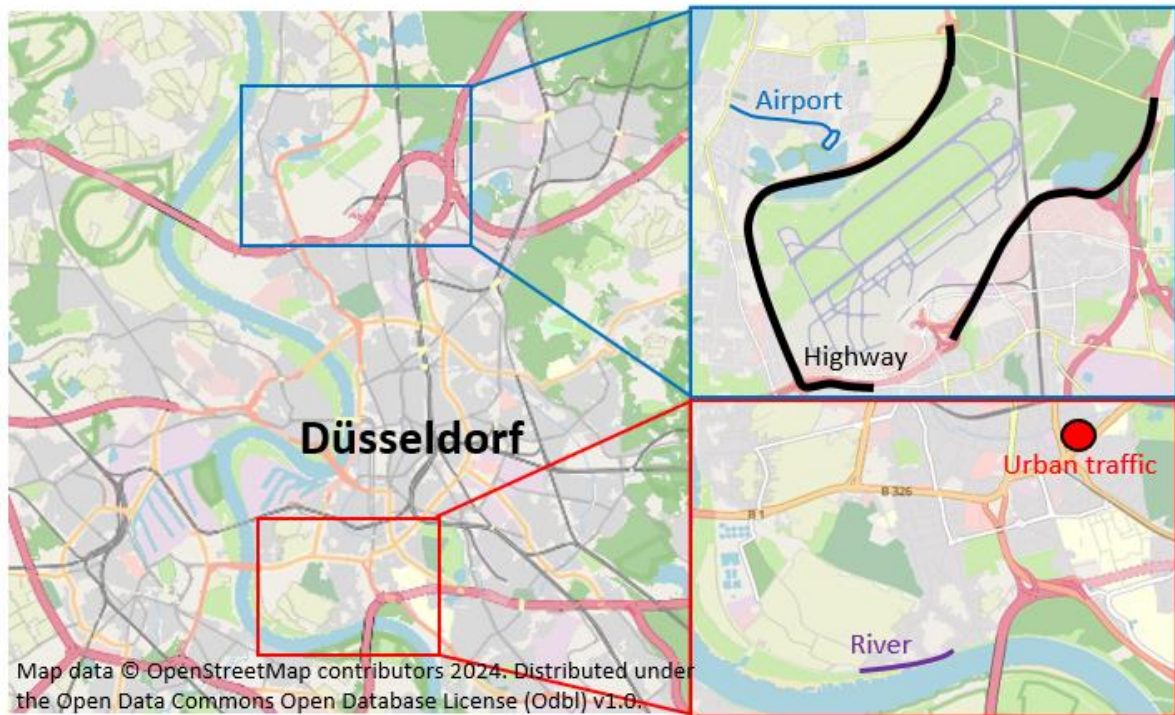

Figure S4: Measurement locations in Düsseldorf. Black and purple lines indicate driving measurements (see also Lepistö et al. 2023).

## Particle effective density

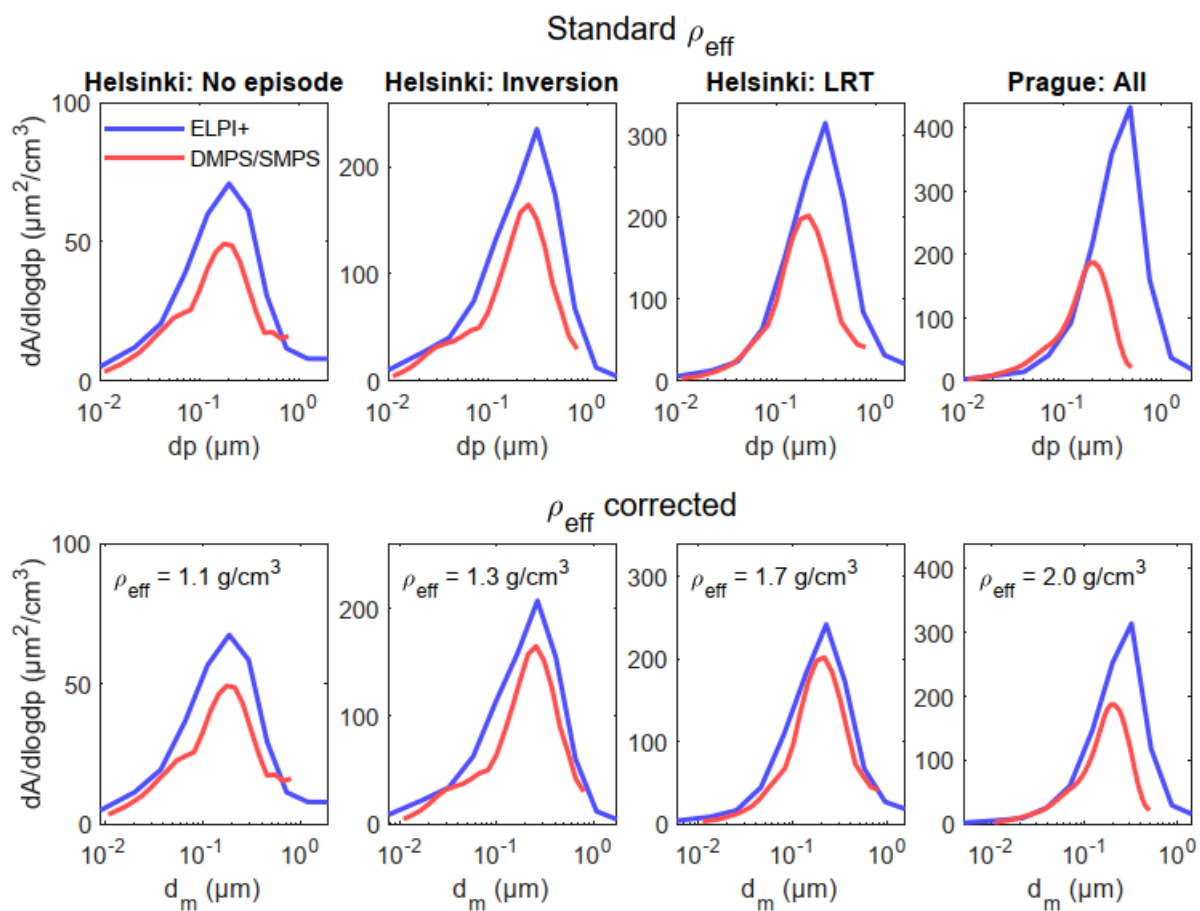

Figure S5: Average particle surface area size distributions measured with the ELPI+, DMPS (Helsinki) and SMPS (Prague) during the studied periods with and without corrections for the particle effective density.

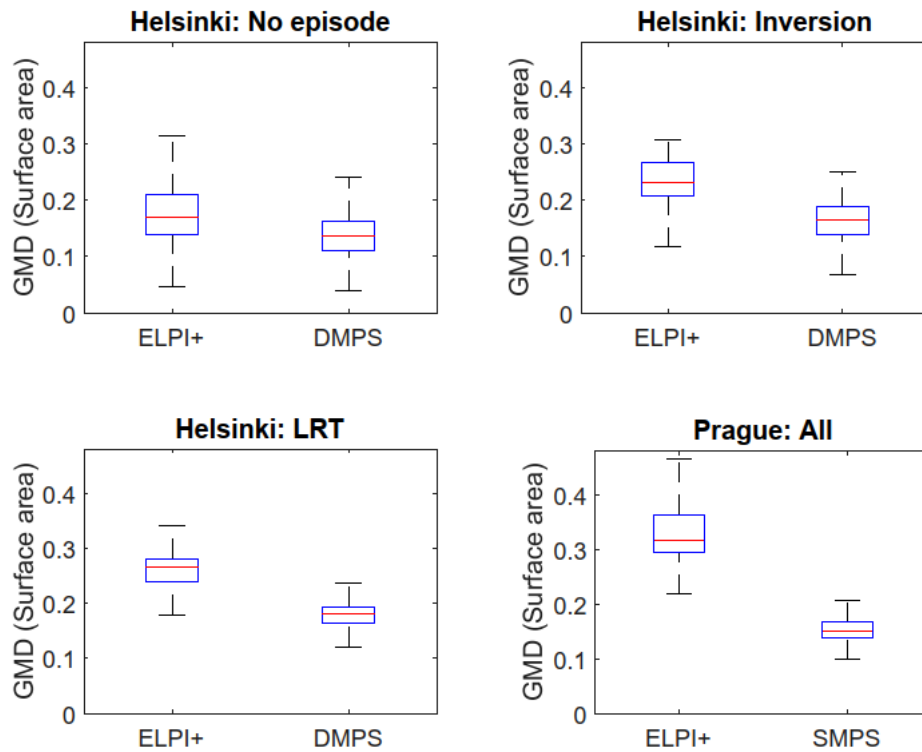

Figure S6: Boxplots of the measured geometric mean diameters of particle surface area size distributions with the ELPI+ (aerodynamic diameter) and DMPS or SMPS (mobility equivalent diameter).

## Particle hygroscopicity and the lung deposition

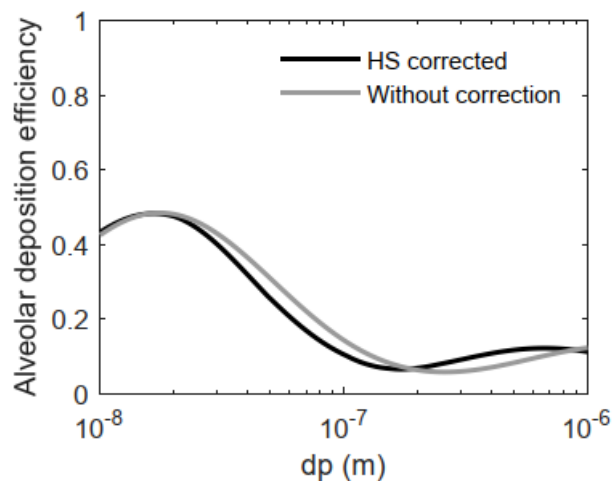

Figure S7: The utilised function of particle lung deposition efficiency (standard  $\rho_{\text{eff}}$ ) in the lung alveoli with and without correction for the particle hygroscopicity (Vu et al. 2015) for road traffic environments.

## Deviations of the measured concentrations

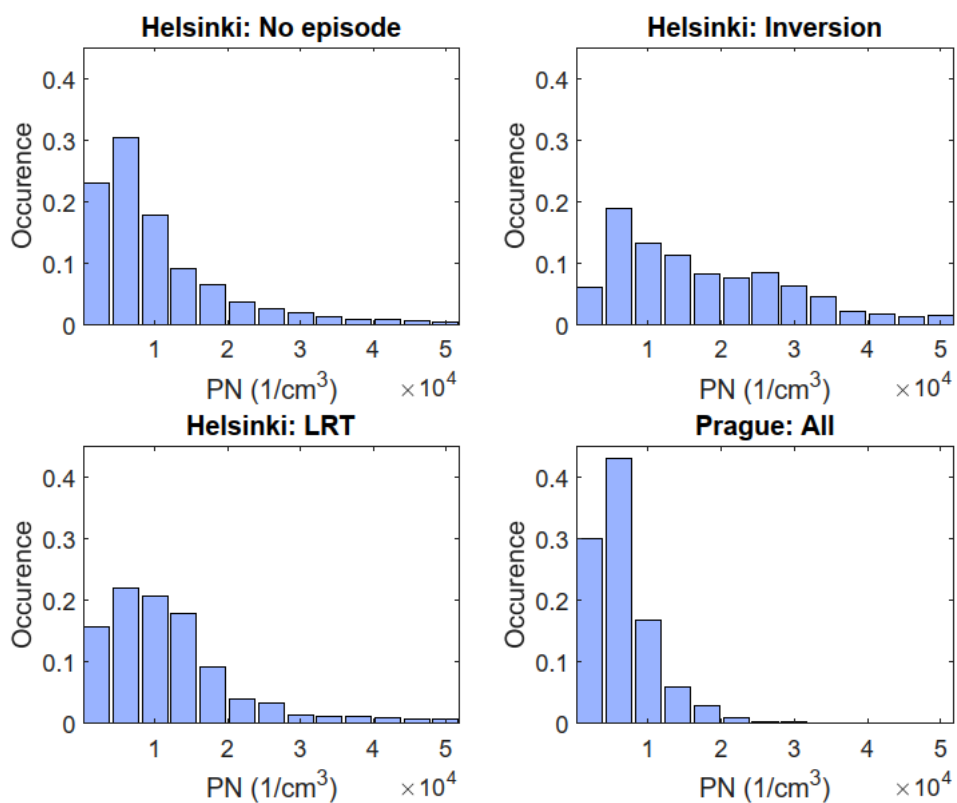

Figure S8: Deviation of the measured PN concentrations in Helsinki and Prague.

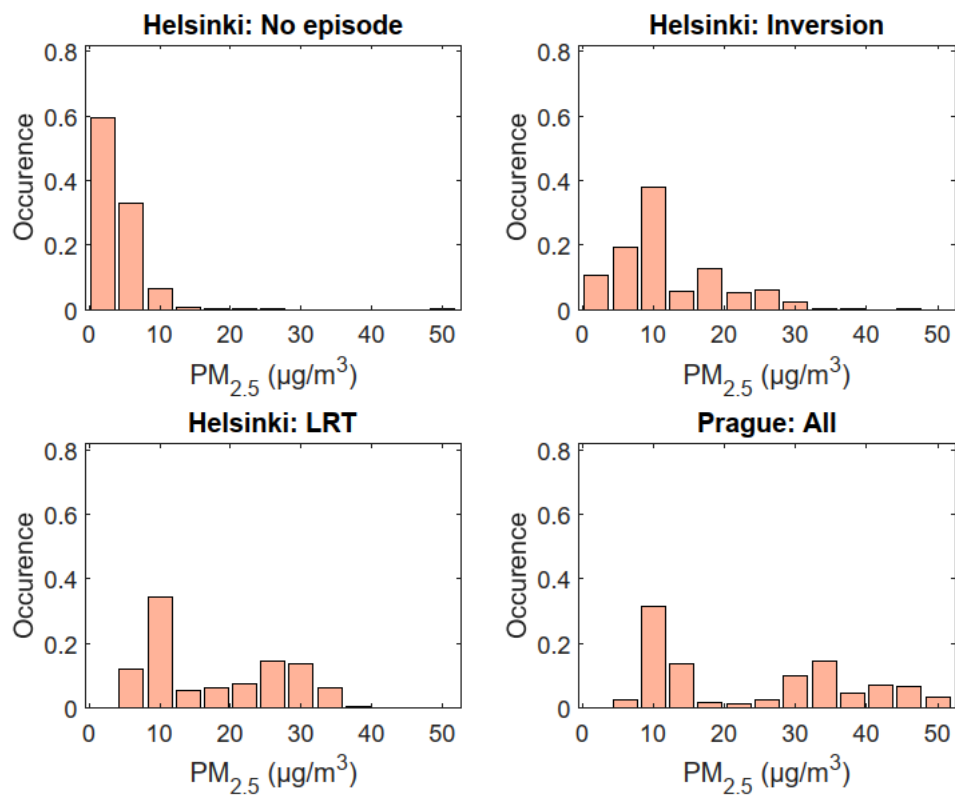

Figure S9: Deviation of the measured PM<sub>2.5</sub> concentrations in Helsinki and Prague measurements.

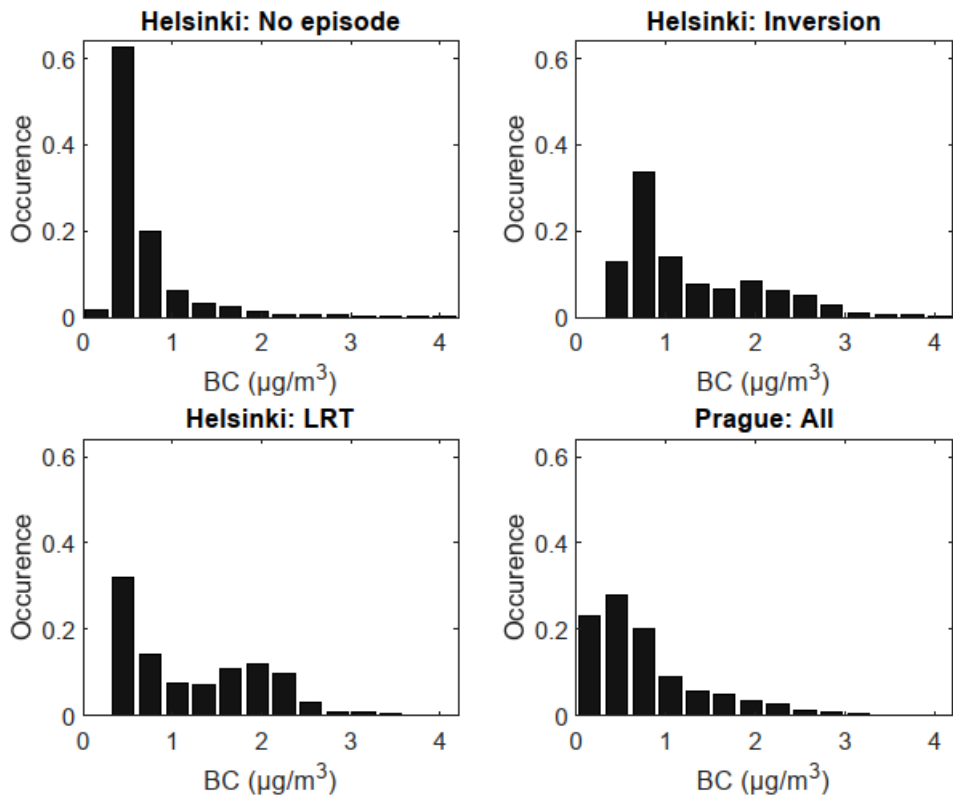

Figure S10: Deviation of the measured BC concentrations in Helsinki and Prague measurements.

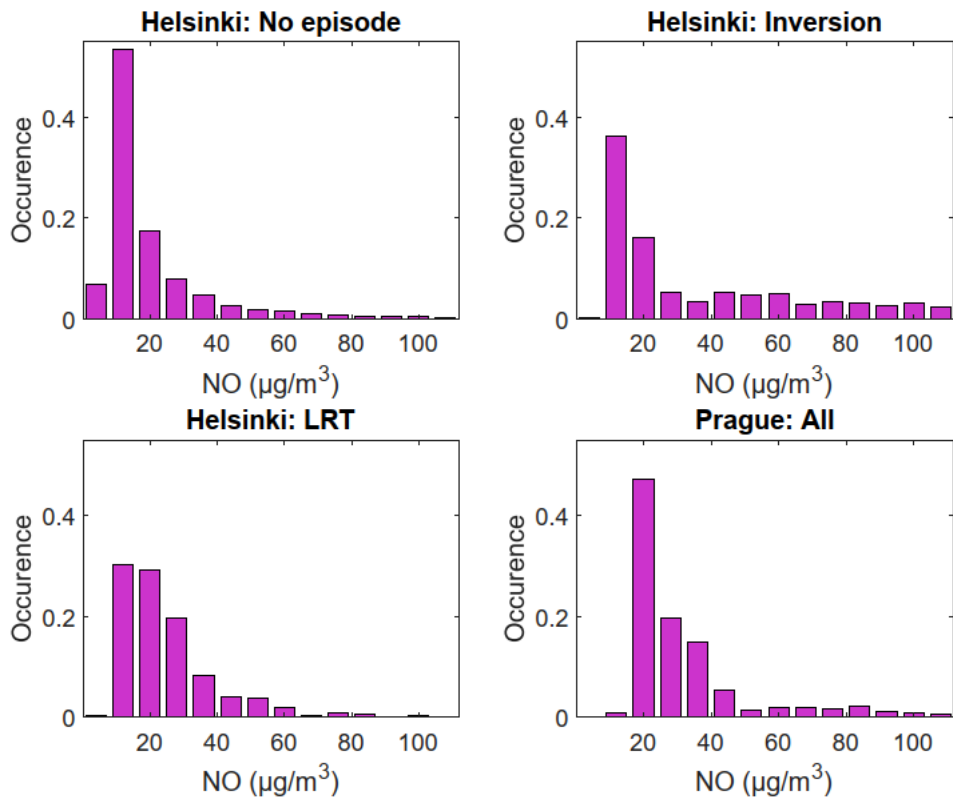

Figure S11: Deviation of the measured NO concentrations in Helsinki and Prague measurements.

Table S1: Data of the measured average LDSA<sup>al</sup> concentrations in Figures 1–6, including the 25<sup>th</sup> and 75<sup>th</sup> percentile whiskers. Note that Partector results cannot be corrected based on the particle effective density ( $\rho_{\text{eff}}$ ) nor hygroscopicity.

| <b>Helsinki: No episodes, LDSA<sup>al</sup> (<math>\mu\text{m}^2/\text{cm}^3</math>)</b> |                         |                         |                  |
|------------------------------------------------------------------------------------------|-------------------------|-------------------------|------------------|
|                                                                                          | ELPI+                   | DMPS                    | Partector        |
| General assumptions                                                                      | <i>11.5 (6.9–17.7)</i>  | <i>8.5 (5.0–13.7)</i>   | 10.5 (6.1–17.0)  |
| $\rho_{\text{eff}}$ -corrected                                                           | <i>11.3 (6.8–17.4)</i>  | <i>8.6 (5.0–13.8)</i>   |                  |
| $\rho_{\text{eff}}$ - and hygroscopicity corrected                                       | <i>10.2 (6.2–15.7)</i>  | <i>8.2 (4.9–12.8)</i>   |                  |
| <b>Helsinki: Inversion, LDSA<sup>al</sup> (<math>\mu\text{m}^2/\text{cm}^3</math>)</b>   |                         |                         |                  |
|                                                                                          | ELPI+                   | DMPS                    | Partector        |
| General assumptions                                                                      | <i>28.4 (16.3–53.9)</i> | <i>20.2 (11.1–39.3)</i> | 24.7 (13.1–45.8) |
| $\rho_{\text{eff}}$ -corrected                                                           | <i>26.7 (15.3–51.9)</i> | <i>20.5 (11.2–39.9)</i> |                  |
| $\rho_{\text{eff}}$ - and hygroscopicity corrected                                       | <i>26.5 (16.1–49.4)</i> | <i>20.7 (12.0–38.6)</i> |                  |
| <b>Helsinki: LRT, LDSA<sup>al</sup> (<math>\mu\text{m}^2/\text{cm}^3</math>)</b>         |                         |                         |                  |
|                                                                                          | ELPI+                   | DMPS                    | Partector        |
| General assumptions                                                                      | <i>26.9 (15.6–46.6)</i> | <i>18.6 (11.0–30.9)</i> | 20.5 (11.5–34.1) |
| $\rho_{\text{eff}}$ -corrected                                                           | <i>24.7 (14.5–42.7)</i> | <i>19.5 (11.4–32.7)</i> |                  |
| $\rho_{\text{eff}}$ - and hygroscopicity corrected                                       | <i>23.6 (12.8–44.8)</i> | <i>19.6 (11.0–34.4)</i> |                  |
| <b>Prague: All, LDSA<sup>al</sup> (<math>\mu\text{m}^2/\text{cm}^3</math>)</b>           |                         |                         |                  |
|                                                                                          | ELPI+                   | SMPS                    | Partector        |
| General assumptions                                                                      | <i>27.1 (15.6–42.3)</i> | <i>14.7 (9.5–20.5)</i>  | 18.1 (11.6–25.0) |
| $\rho_{\text{eff}}$ -corrected                                                           | <i>23.3 (13.6–35.7)</i> | <i>15.5 (9.9–21.7)</i>  |                  |
| $\rho_{\text{eff}}$ - and hygroscopicity corrected                                       | <i>24.7 (14.8–38.0)</i> | <i>15.0 (9.4–21.1)</i>  |                  |



Table S2: Data of Figure 8 and Figure S12 with 25<sup>th</sup> and 75<sup>th</sup> percentiles as well as Pearson correlation coefficients between LDSA<sup>al</sup> concentrations measured with the ELPI+ and Partector.

|                                  | <b>ELPI+<br/>LDSA<sup>al</sup> &lt;<br/>2.5 µm<br/>(µm<sup>2</sup>/cm<sup>3</sup>)</b> | <b>ELPI+<br/>LDSA<sup>al</sup> &lt;<br/>0.4 µm<br/>(µm<sup>2</sup>/cm<sup>3</sup>)</b> | <b>Partector<br/>LDSA<sup>al</sup><br/>(µm<sup>2</sup>/cm<sup>3</sup>)</b> | <b>ELPI+<br/>PN<br/>(1/cm<sup>3</sup>)</b> | <b>ELPI+<br/>PM<sub>2.5</sub><br/>(µg/m<sup>3</sup>)</b> | <b>R<sup>2</sup> (LDSA<sup>al</sup><br/>ELPI+ vs.<br/>Partector)</b> |
|----------------------------------|----------------------------------------------------------------------------------------|----------------------------------------------------------------------------------------|----------------------------------------------------------------------------|--------------------------------------------|----------------------------------------------------------|----------------------------------------------------------------------|
| <b>Helsinki: No episode</b>      | 11.5 (6.9–17.7)                                                                        | 9.8 (5.7–16.0)                                                                         | 10.5 (6.1–17.0)                                                            | 7 700 (4 100–13 700)                       | 3.4 (2.3–5.2)                                            | 0.98                                                                 |
| <b>Helsinki: Inversion</b>       | 28.4 (16.3–53.9)                                                                       | 22.9 (11.9–45.3)                                                                       | 24.7 (13.1–45.8)                                                           | 16 200 (8 100–29 200)                      | 9.9 (7.2–16.6)                                           | 0.99                                                                 |
| <b>Helsinki: LRT</b>             | 26.9 (15.6–46.6)                                                                       | 19.1 (11.1–31.2)                                                                       | 20.5 (11.5–34.1)                                                           | 9 700 (5 600–15 500)                       | 15.4 (9.5–26.8)                                          | 0.98                                                                 |
| <b>Prague: All</b>               | 27.1 (15.6–42.3)                                                                       | 14.0 (9.2–19.4)                                                                        | 18.1 (11.6–25.0)                                                           | 5 700 (3 700–8 100)                        | 20.2 (11.1–35.3)                                         | 0.92                                                                 |
| <b>Tampere: No episode</b>       | 8.3 (4.7–13.9)                                                                         | 5.7 (3.2–9.6)                                                                          | 6.3 (3.6–10.3)                                                             | 2 800 (1 400–5 900)                        | 4.2 (2.4–8.2)                                            | 0.97                                                                 |
| <b>Tampere: Inversion</b>        | 55.5 (40.6–86.9)                                                                       | 44.6 (31.4–68.9)                                                                       | 46.8 (33.9–71.9)                                                           | 23 800 (16 700–34 500)                     | 22.9 (16.2–38.0)                                         | 0.98                                                                 |
| <b>Düsseldorf: Urban traffic</b> | 31.8 (21.3–49.3)                                                                       | 18.8 (13.4–23.4)                                                                       | 21.0 (15.1–26.7)                                                           | 12 700 (8 700–16 600)                      | 20.7 (12.0–35.1)                                         | 0.98                                                                 |
| <b>Düsseldorf: Highway</b>       | 36.6 (24.8–47.5)                                                                       | 27.2 (17.9–38.3)                                                                       | 30.8 (20.6–43.5)                                                           | 28 900 (16 300–48 700)                     | 17.1 (11.6–24.6)                                         | 0.95                                                                 |
| <b>Düsseldorf: Airport</b>       | 34.2 (30.6–41.9)                                                                       | 24.4 (19.1–31.7)                                                                       | 27.4 (21.8–35.6)                                                           | 26 400 (16 100–44 500)                     | 16.9 (13.0–25.5)                                         | 0.95                                                                 |
| <b>Düsseldorf: River</b>         | 33.0 (24.9–50.2)                                                                       | 17.6 (12.5–24.9)                                                                       | 20.8 (15.2–28.5)                                                           | 11 700 (8 300–13 600)                      | 24.6 (19.7–44.3)                                         | 0.98                                                                 |

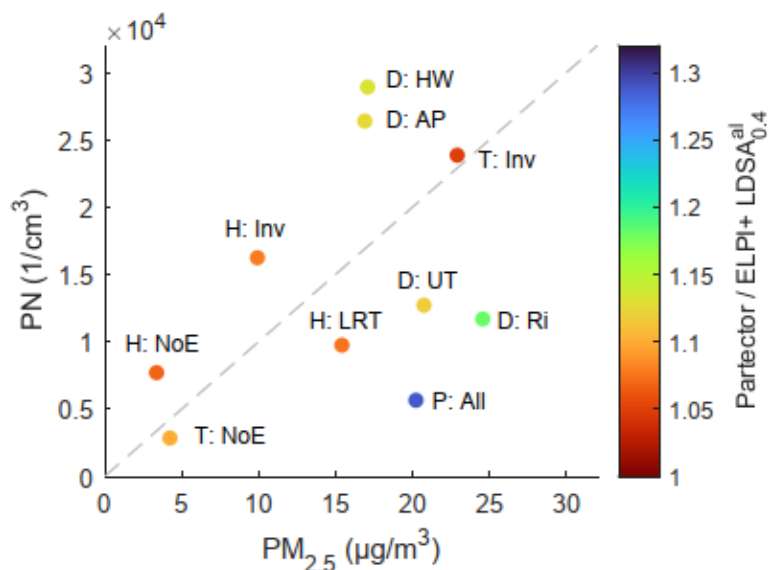

Figure S12: Comparison of LDSA<sup>al</sup> concentrations measured with Partector and ELPI+ as a function of particle number (PN) and PM<sub>2.5</sub> concentration. With ELPI+ only particles smaller than 400 nm are considered (LDSA<sup>al</sup><sub>0.4</sub>). Each dot represents individual measurements in different locations (Table S2).

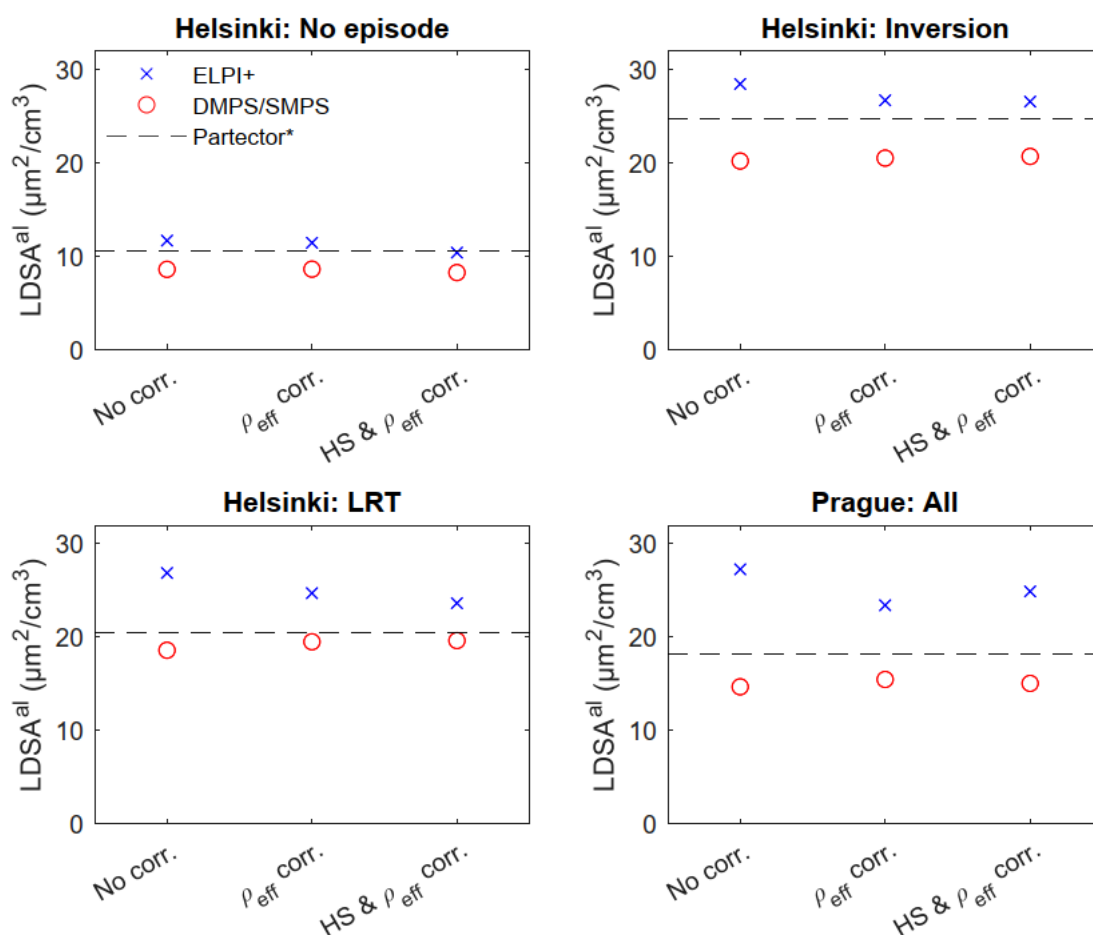

Figure S13: Comparison of average LDSA<sup>al</sup> concentrations. “No corr.” indicates data measured with the general assumptions, “ρ<sub>eff</sub> corr.” indicates data corrected with the effective density and “ρ<sub>eff</sub> & HS corr.” indicates data corrected with both effective density and hygroscopicity. The DMPS measured in Helsinki, and the SMPS in Prague. \*Note that the corrections cannot be done with the Partector data.

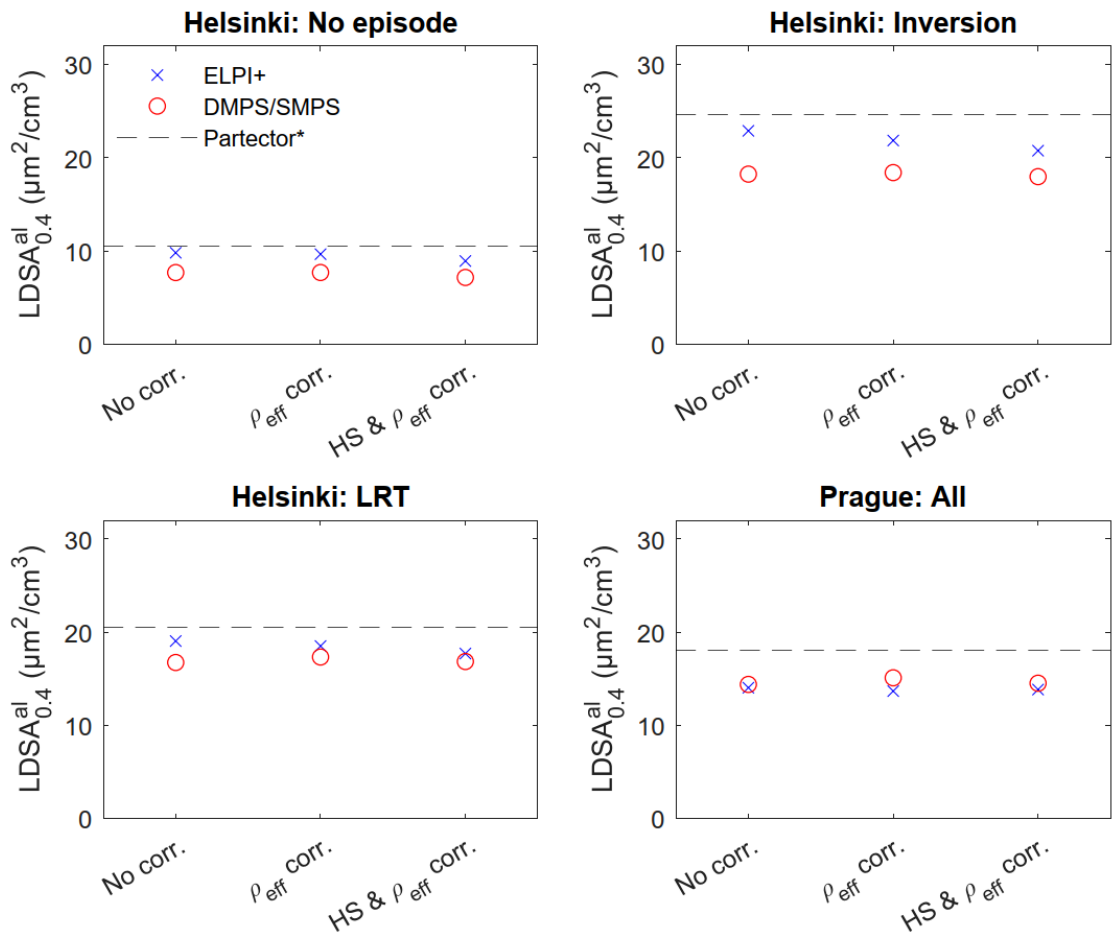

Figure S14: Comparison of average LDSA<sup>al</sup> concentrations attributable to particles smaller than 400 nm. “No corr.” indicates data measured with the general assumptions, “ρ<sub>eff</sub> corr.” indicates data corrected with the effective density and “ρ<sub>eff</sub> & HS corr.” indicates data corrected with both effective density and hygroscopicity. The DMPS measured in Helsinki, and the SMPS in Prague. \*Note that the corrections cannot be done with the Partector data.
